# Supplementary material
Source: PubMed Central journal article supplement (PMC3214999)
Supplement: 1106454108_pnas.201106454SI.pdf [file 1106454108_pnas.201106454SI.pdf]

# Supporting Information

Goto et al. 10.1073/pnas.1106454108

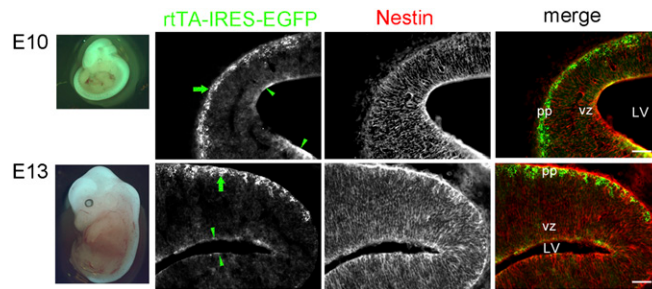

**Fig. S1.** Expression of the *Nes-rtTA-IRES-EGFP* transgene in embryonic neuroprogenitor cells. *Tsc1<sup>cc</sup> Nes-rtTA<sup>+</sup>* embryos show EGFP fluorescent signal (Left) and brain sections stained with EGFP antibody (green) and nestin antibody (red) (Right) at E10 and E13. Note that the EGFP signal colocalizes with the nestin signal in cerebral cortical neuroepithelium of the ventricular zone (vz, arrowheads) and in preplate cells (pp, arrows). LV, lateral ventricle.

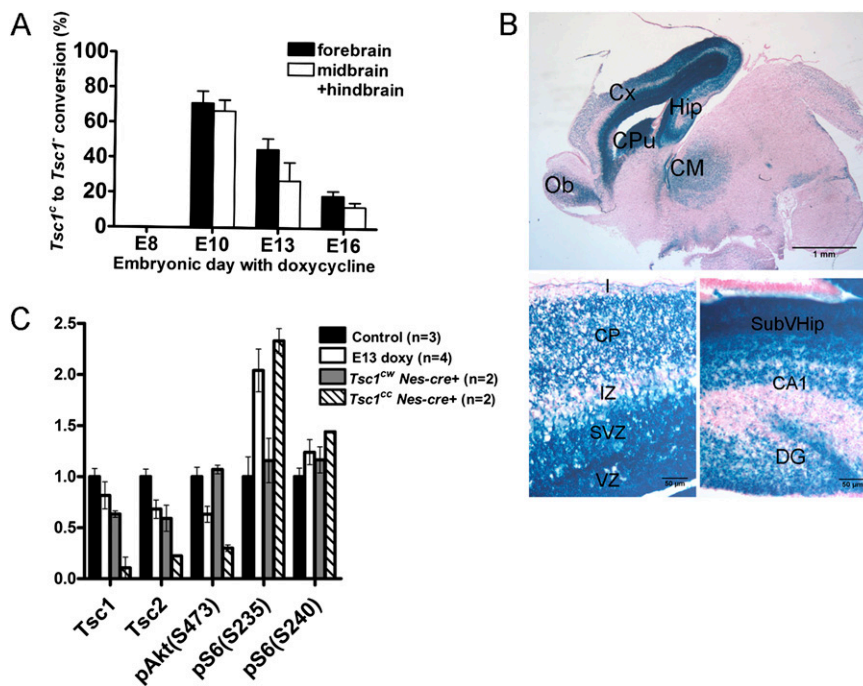

**Fig. S2.** Mosaic loss of *Tsc1* in doxycycline-treated *Tsc1<sup>cc</sup> Nes-rtTA<sup>+</sup> TetOP-cre<sup>+</sup>* mice. (A) Recombination at the *Tsc1* floxed allele in P0 brain determined by MLPA. (B) LacZ staining on E16 *Tsc1<sup>cc</sup> Nes-rtTA<sup>+</sup> TetOP-cre<sup>+</sup>* mutant brain 3 d after doxycycline administration at E13. (C) Densitometry of immunoblot analysis of P0 brain lysates. *Tsc1<sup>cc</sup> Nes-rtTA<sup>+</sup> TetOP-cre<sup>+</sup>* mice showed partial loss of *Tsc1* and moderate activation of the mTOR pathway in comparison to *Tsc1<sup>cc</sup> Nestin-cre<sup>+</sup>* mutants. CA1, cornu ammonis area 1; CP, cortical plate; DG, dentate gyrus; I, cortical layer 1; IZ, intermediate zone of cortex; SubVHip, subventricular zone of hippocampus; SVZ, subventricular zone of cortex; VZ, ventricular zone of cortex. [Scale bars: B (Upper), 1 mm; B (Lower), 50  $\mu$ m.]

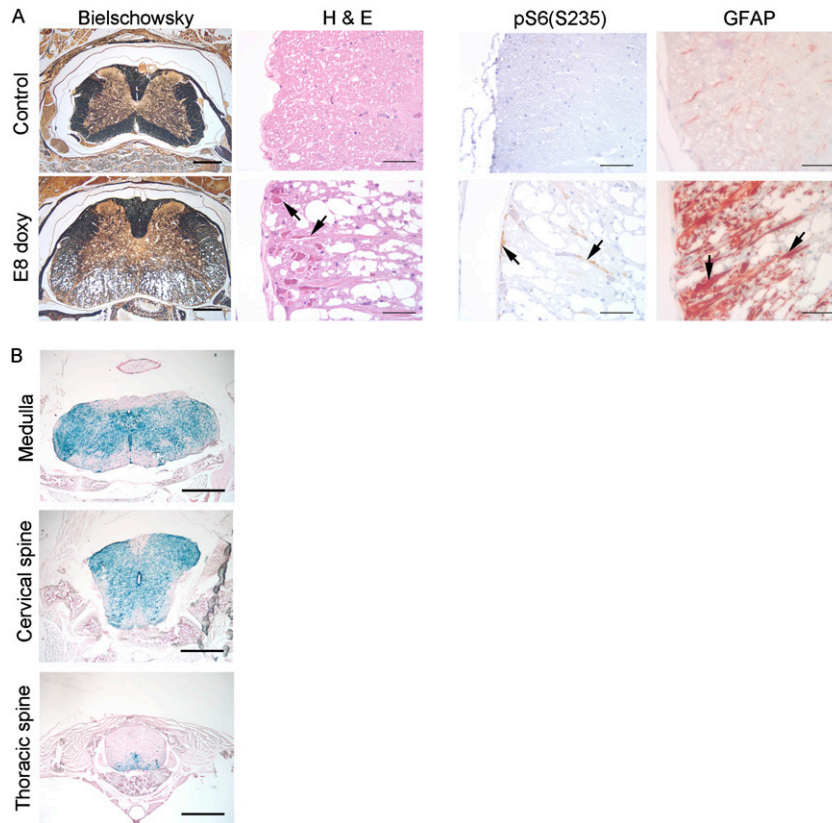

**Fig. S3.** White matter degeneration in upper spinal cord of *Tsc1<sup>cc</sup> Nes-rtTA<sup>+</sup> TetOP-cre<sup>+</sup> (E8 doxy)* mice. (A) Vacuolated white matter in ventral column of cervical spinal cord at 9 mo of age. Mineralization (H&E) and abnormally elevated pS6(S235) levels were observed in very dense GFAP<sup>+</sup> Rosenthal fiber-like glial fiber (arrows). (B) LacZ reporter staining in spinal cord of *Tsc1<sup>cc</sup> Nes-rtTA<sup>+</sup> TetOP-cre<sup>+</sup> (E8 doxy)* mice. Cre expression is high in the medulla and cervical spinal cord, and it is restricted to the ventral region in thoracic cord and at lower levels. (Scale bars: A, 500  $\mu$ m [Bielschowsky], 50  $\mu$ m [H&E, pS6(S235), and GFAP]; B, 1,000  $\mu$ m.)

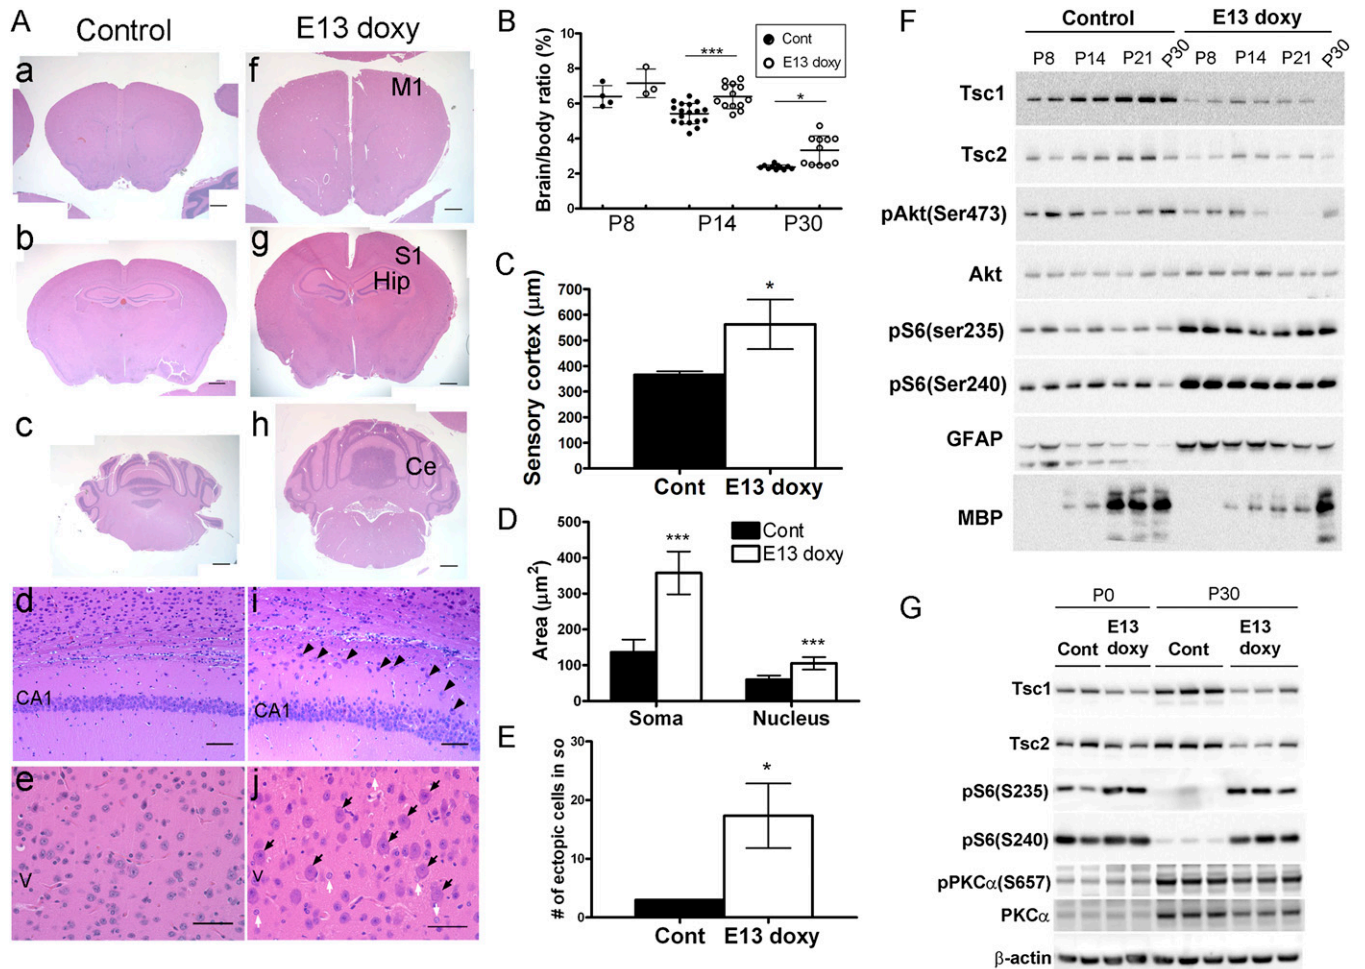

**Fig. 54.** Macrocephaly, hypomyelination, and gliosis in *Tsc1<sup>cc</sup> Nes-rtTA<sup>+</sup> TetOP-cre<sup>+</sup> (E13 doxy)* mice. (A) Coronal brain sections of P42 control mice (a–e) and *Tsc1<sup>cc</sup> Nes-rtTA<sup>+</sup> TetOP-cre<sup>+</sup> (E13 doxy)* mice (f–j). The cerebral cortex is greatly enlarged, including the primary motor cortex (M1) and somatosensory cortex (S1). CA1, comu ammonis area 1; Ce, cerebellum; Hip, hippocampus. (i and j) Ectopic cells in the stratum oriens (arrowheads), enlarged dysmorphic layer V neurons (black arrows), and hypertrophic astrocytes (white arrows) are indicated. (Scale bars: A, a–c and f–h, 500  $\mu$ m; A, d, e, i, and j, 50  $\mu$ m.) (B) Brain-to-body weight ratios. (C) Somatosensory cortex width at P42 ( $n = 3$ ). Cont, control. (D) Cell (soma) and nucleus size analysis on layer V neurons in somatosensory area at P42 ( $n = 20$  cells, 2 animals each). (E) Numbers of ectopic cells found in CA1 stratum oriens. (F) Reduced expression of Tsc1 and Tsc2, activation of mTORC1, and related effects during development of *Tsc1<sup>cc</sup> Nes-rtTA<sup>+</sup> TetOP-cre<sup>+</sup> (E13 doxy)* mice. Immunoblotting of P8–P30 cerebral cortex lysates of control and mutant mice (E13 doxy) was performed. Tsc1, Tsc2, and pAkt levels are reduced; mTORC1 is activated (increased pS6); and GFAP levels are increased at all time points examined. Myelination (MBP) was delayed. (G) Reduced mTORC2 activity in the brain of *Tsc1<sup>cc</sup> Nes-rtTA<sup>+</sup> TetOP-cre<sup>+</sup> (E13 doxy)* mice at P30. Both phospho-PKC $\alpha$  (S657) and total PKC $\alpha$  levels are decreased in young adult mutant brain. Also, note that mTORC1 activity in the normal brain is higher at birth than at P30, as assessed by pS6(S235) and pS6(S240) levels. \* $P < 0.05$ ; \*\* $P < 0.01$ ; \*\*\* $P < 0.001$ .
